# Supplementary material for: Exploring veterinary students’ awareness and perception of zoonoses risks, infection control practices, and biosecurity measures in Ethiopia
Source: Frontiers journal article supplement (doi:10.3389/fvets.2024.1385849), 2024-07-09
Supplement: Data_Sheet_1.PDF [file Data_Sheet_1.PDF]

\* 1. Please indicate your gender.

- ☐ Male
- ☐ Female

\* 2. Please indicate your age (in years)

\* 3. Which university are you studying at?

\* 4. Year of study

- ☐ 3
- ☐ 4
- ☐ 5
- ☐ 6

\* 5. Which region are you from?

- ☐ Addis Ababa (city)
- ☐ Afar Region
- ☐ Amhara Region
- ☐ Benishangul-Gumuz Region
- ☐ Dire Dawa (city)
- ☐ Gambela Region
- ☐ Harari Region
- ☐ Oromia Region
- ☐ Sidama Region
- ☐ Somali Region
- ☐ Southern Nations, Nationalities, and Peoples' Region
- ☐ Tigray Region

\* 6. What level of importance do you attribute to the following statements?

|                                                                                                                    | Extremely<br>important | Very important        | Moderately<br>important | Slightly important    | Not at all<br>important |
|--------------------------------------------------------------------------------------------------------------------|------------------------|-----------------------|-------------------------|-----------------------|-------------------------|
| How important is collaboration between human and animal health-care providers for ensuring public health?          | <input type="radio"/>  | <input type="radio"/> | <input type="radio"/>   | <input type="radio"/> | <input type="radio"/>   |
| How important is monitoring and detecting zoonoses outbreaks in animal populations for preventing human infection? | <input type="radio"/>  | <input type="radio"/> | <input type="radio"/>   | <input type="radio"/> | <input type="radio"/>   |
| How important is maintaining ecosystem and environmental health for protecting human and animal health?            | <input type="radio"/>  | <input type="radio"/> | <input type="radio"/>   | <input type="radio"/> | <input type="radio"/>   |
| How important is preventing human encroachment for preventing emergence of new human and animal diseases?          | <input type="radio"/>  | <input type="radio"/> | <input type="radio"/>   | <input type="radio"/> | <input type="radio"/>   |
| How important is addressing climate change for preventing emergence of new human and animal diseases?              | <input type="radio"/>  | <input type="radio"/> | <input type="radio"/>   | <input type="radio"/> | <input type="radio"/>   |

\* 7. To what extent do you agree or disagree with the following statements?

|                                                                                | Strongly disagree     | Disagree              | Neither agree or<br>disagree | Agree                 | Strongly agree        |
|--------------------------------------------------------------------------------|-----------------------|-----------------------|------------------------------|-----------------------|-----------------------|
| Consumers of animal products are at risk of contracting zoonoses               | <input type="radio"/> | <input type="radio"/> | <input type="radio"/>        | <input type="radio"/> | <input type="radio"/> |
| Animals can serve as disease sentinels for human health                        | <input type="radio"/> | <input type="radio"/> | <input type="radio"/>        | <input type="radio"/> | <input type="radio"/> |
| Climate change directly and indirectly impacts human and animal health         | <input type="radio"/> | <input type="radio"/> | <input type="radio"/>        | <input type="radio"/> | <input type="radio"/> |
| Veterinary and animal health professionals are at risk of contracting zoonoses | <input type="radio"/> | <input type="radio"/> | <input type="radio"/>        | <input type="radio"/> | <input type="radio"/> |
| Farmers and farm-workers are exposed to the risk of contracting zoonoses       | <input type="radio"/> | <input type="radio"/> | <input type="radio"/>        | <input type="radio"/> | <input type="radio"/> |

## Biosecurity

\* 8. What does the term 'biosecurity' mean to you?

- ☐ Preventing entry of pathogens or diseases onto farms
- ☐ Managing diseases / pathogens within farms
- ☐ Preventing exit of diseases / pathogens from farms
- ☐ General security to prevent theft of animals
- ☐ Protecting workers from disease
- ☐ Unsure
- ☐ Other (please specify)

\* 9. How often do you change your overalls, apron or overcoat?

- ☐ I wear reusable clothing and change it every day
- ☐ I wear reusable clothing and change it as soon as it is visually dirty
- ☐ I wear reusable clothing and change it after specific 'dirty' work
- ☐ I wear reusable clothing and change it after every cattle farm
- ☐ I use a set of disposable clothing for each cattle farm
- ☐ I use disposable clothing (i.e. different set per cattle farm)
- ☐ I use clothing provided by the farmer

\* 10. When performing surgeries, do you wear:

- ☐ Disposable calving gowns
- ☐ Washable calving gowns under ordinary circumstances, but disposable gown in case of known septic risk (e.g. emphysematous calf)
- ☐ A washable calving gown

\* 11. What do you use when washing your work clothes and linen? Please check all boxes corresponding to your choices.

- ☐ Detergent
- ☐ Disinfectant
- ☐ Soap
- ☐ Cold water
- ☐ Warm water
- ☐ Hot water

\* 12. How do you take care of your work boots?

|                                                    | After each farm       | Before each farm      | After and before each farm | Between two buildings on same farm | Only when they are visually dirty | Never                 |
|----------------------------------------------------|-----------------------|-----------------------|----------------------------|------------------------------------|-----------------------------------|-----------------------|
| Brushing                                           | <input type="radio"/> | <input type="radio"/> | <input type="radio"/>      | <input type="radio"/>              | <input type="radio"/>             | <input type="radio"/> |
| Use of water jet                                   | <input type="radio"/> | <input type="radio"/> | <input type="radio"/>      | <input type="radio"/>              | <input type="radio"/>             | <input type="radio"/> |
| Cleaning with soap                                 | <input type="radio"/> | <input type="radio"/> | <input type="radio"/>      | <input type="radio"/>              | <input type="radio"/>             | <input type="radio"/> |
| Disinfection                                       | <input type="radio"/> | <input type="radio"/> | <input type="radio"/>      | <input type="radio"/>              | <input type="radio"/>             | <input type="radio"/> |
| Stepping through foot bath or stepping on foot mat | <input type="radio"/> | <input type="radio"/> | <input type="radio"/>      | <input type="radio"/>              | <input type="radio"/>             | <input type="radio"/> |

\* 13. How often do you replace the following disposable materials and equipment?

|                            | After each animal     | After each herd / group | After each farm       | Every day             | Less frequently than every day |
|----------------------------|-----------------------|-------------------------|-----------------------|-----------------------|--------------------------------|
| Needles for injections     | <input type="radio"/> | <input type="radio"/>   | <input type="radio"/> | <input type="radio"/> | <input type="radio"/>          |
| Needles for sampling       | <input type="radio"/> | <input type="radio"/>   | <input type="radio"/> | <input type="radio"/> | <input type="radio"/>          |
| Syringes                   | <input type="radio"/> | <input type="radio"/>   | <input type="radio"/> | <input type="radio"/> | <input type="radio"/>          |
| Scalpel and razor blades   | <input type="radio"/> | <input type="radio"/>   | <input type="radio"/> | <input type="radio"/> | <input type="radio"/>          |
| Examination gloves         | <input type="radio"/> | <input type="radio"/>   | <input type="radio"/> | <input type="radio"/> | <input type="radio"/>          |
| Full-arm veterinary gloves | <input type="radio"/> | <input type="radio"/>   | <input type="radio"/> | <input type="radio"/> | <input type="radio"/>          |

\* 14. How do you clean and take care of your reusable material and equipment (e.g. needles, syringes, scalpels, razors, gloves)?

- ☐ Cleaning
- ☐ Cleaning and soaking in disinfectant
- ☐ Cleaning and autoclaving (hot sterilization)
- ☐ Other (please specify)

\* 15. How often do you wash your hands while working with animals?

- ☐ After each animal
- ☐ After each lot
- ☐ After each cattle farm
- ☐ Other (please specify)

\* 16. How do you wash or clean your hands while working with animals?

- ☐ With clear water
- ☐ With a soap
- ☐ With an antibacterial soap
- ☐ With hand sanitizer
- ☐ Other (please specify)

\* 17. How do you dry your hands?

- ☐ With re-usable towel
- ☐ With a paper towel
- ☐ Other (please specify)

\* 18. Do you carry a yellow container for medical waste when you visit farms (i.e. in your car or work bag)?

- ☐ Yes
- ☐ No

\* 19. How do you dispose of empty medicine packaging and vaccine flasks / vials?

- ☐ Yellow container for medical waste in the lab
- ☐ Domestic trash can
- ☐ Collected by a specialized company
- ☐ Glass waste container
- ☐ Government waste place
- ☐ Other (please specify)

|  |
|--|
|  |
|--|

\* 20. Have you been vaccinated for zoonotic diseases?

- ☐ No, I have not been vaccinated
- ☐ Yes, for Tuberculosis
- ☐ Yes, for Tetanus
- ☐ Yes, for Rabies
- ☐ Other (please specify)

|  |
|--|
|  |
|--|

\* 21. In each of the following scenarios, please indicate the biosecurity measures you would implement in examining animals and performing procedures.

[illegible]

## 'One-Health'

### 22. What is your understanding of the term 'One-Health'?

- ☐ A collaborative approach of multiple health science professions to designing and implementing programmes, policies, legislation and research working together to achieve better public health outcomes.
- ☐ A collaborative framework involving the health of humans, animals, and ecosystems, including also environmental sustainability and socioeconomic stability
- ☐ A collaborative approach aiming to is the achievement of the highest attainable standard of health, well-being, and equity worldwide through judicious attention to the human systems—political, economic, and social—that shape the future of humanity and the Earth's natural systems that define the safe environmental limits within which humanity can flourish.

### \* 23. How interested are you in the following?

|                                                                                                                        | Very interested       | Somewhat interested   | Minimally interested  | No Interest           |
|------------------------------------------------------------------------------------------------------------------------|-----------------------|-----------------------|-----------------------|-----------------------|
| 'One Health' educational experiences                                                                                   | <input type="radio"/> | <input type="radio"/> | <input type="radio"/> | <input type="radio"/> |
| Lectures and courses taught by physicians                                                                              | <input type="radio"/> | <input type="radio"/> | <input type="radio"/> | <input type="radio"/> |
| Lectures and courses taught by ecologists                                                                              | <input type="radio"/> | <input type="radio"/> | <input type="radio"/> | <input type="radio"/> |
| Lectures and courses taught by biologists                                                                              | <input type="radio"/> | <input type="radio"/> | <input type="radio"/> | <input type="radio"/> |
| Lectures and courses taught by interdisciplinary team of health professionals                                          | <input type="radio"/> | <input type="radio"/> | <input type="radio"/> | <input type="radio"/> |
| Student exchange programs with human health medical colleges                                                           | <input type="radio"/> | <input type="radio"/> | <input type="radio"/> | <input type="radio"/> |
| Student exchange programs with public health schools                                                                   | <input type="radio"/> | <input type="radio"/> | <input type="radio"/> | <input type="radio"/> |
| Research opportunities with non-veterinary 'One Health' practitioners                                                  | <input type="radio"/> | <input type="radio"/> | <input type="radio"/> | <input type="radio"/> |
| Networking opportunities with non-veterinary 'One Health' practitioners                                                | <input type="radio"/> | <input type="radio"/> | <input type="radio"/> | <input type="radio"/> |
| Interdisciplinary professional conferences for veterinarians, physicians, and ecosystem health experts                 | <input type="radio"/> | <input type="radio"/> | <input type="radio"/> | <input type="radio"/> |
| Health internships hosted by faculties other than those within Colleges of Veterinary Medicine and Biomedical Sciences | <input type="radio"/> | <input type="radio"/> | <input type="radio"/> | <input type="radio"/> |
| Access to 'One Health' mentors who are non-veterinarians                                                               | <input type="radio"/> | <input type="radio"/> | <input type="radio"/> | <input type="radio"/> |

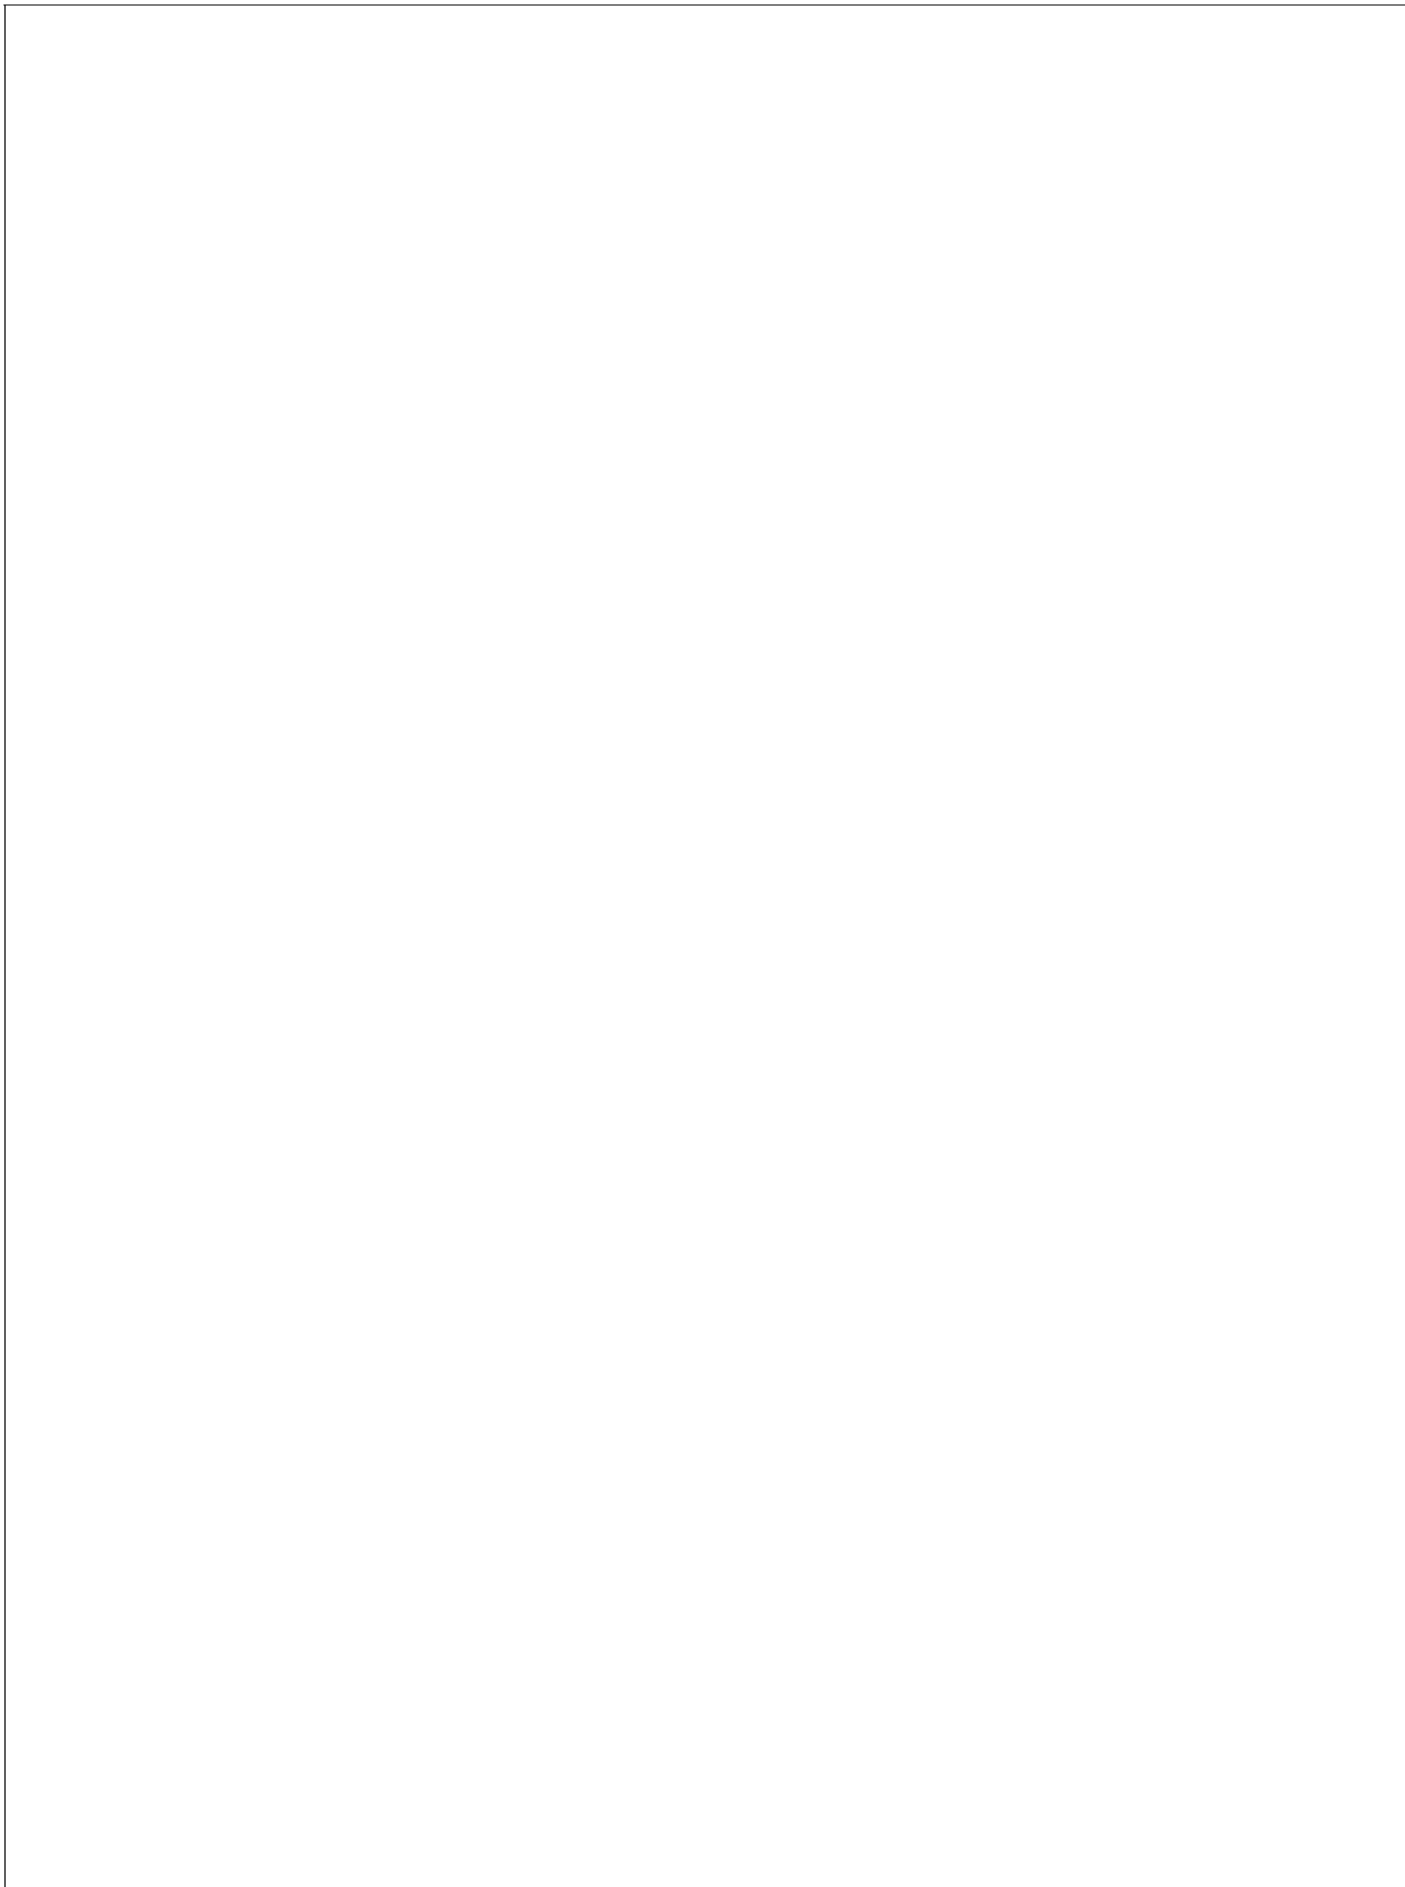



\* 24. Promotion of 'One Health' approach in Ethiopia.

|                                                                                                                          | Yes                   | No                    | Not sure              |
|--------------------------------------------------------------------------------------------------------------------------|-----------------------|-----------------------|-----------------------|
| Is the 'One-Health' approach adopted in your field?                                                                      | <input type="radio"/> | <input type="radio"/> | <input type="radio"/> |
| Do you think veterinary medicine has a role to play in preventing human diseases?                                        | <input type="radio"/> | <input type="radio"/> | <input type="radio"/> |
| 'One-Health' implies better cooperation between doctors and veterinarians                                                | <input type="radio"/> | <input type="radio"/> | <input type="radio"/> |
| 'One-Health' means working at the interaction between human and animal health and the ecosystem                          | <input type="radio"/> | <input type="radio"/> | <input type="radio"/> |
| 'One-Health' is a new approach to global health governance                                                               | <input type="radio"/> | <input type="radio"/> | <input type="radio"/> |
| Is 'One Health' an important approach for you?                                                                           | <input type="radio"/> | <input type="radio"/> | <input type="radio"/> |
| Have you applied the 'One Health' approach in your own work/projects?                                                    | <input type="radio"/> | <input type="radio"/> | <input type="radio"/> |
| Should Ethiopia organize more events and communicate more to spread and implement the 'One Health' approach?             | <input type="radio"/> | <input type="radio"/> | <input type="radio"/> |
| Should Ethiopia put in place 'One Health' national strategies and coordination structures?                               | <input type="radio"/> | <input type="radio"/> | <input type="radio"/> |
| Should Ethiopia strengthen cooperation with international organization (WHO / FAO / OIE)?                                | <input type="radio"/> | <input type="radio"/> | <input type="radio"/> |
| Should Ethiopia focus on specific diseases that develop at the interface between human / animal / environmental spheres? | <input type="radio"/> | <input type="radio"/> | <input type="radio"/> |

\* 25. Please describe your knowledge and skills / approach to communicating and providing advice about zoonoses and human health.

|                                                                                                      | Yes                   | No                    |
|------------------------------------------------------------------------------------------------------|-----------------------|-----------------------|
| I am being trained to work with human health workers                                                 | <input type="radio"/> | <input type="radio"/> |
| I am being trained to communicate with human health workers                                          | <input type="radio"/> | <input type="radio"/> |
| I would be able to recognise if a farmer is affected by a zoonosis                                   | <input type="radio"/> | <input type="radio"/> |
| I would advise farmers to seek medical health when I realize their animal have an important zoonoses | <input type="radio"/> | <input type="radio"/> |
| I would be concerned about the health of farmers when treating their animals                         | <input type="radio"/> | <input type="radio"/> |
| I would be concerned about my health when treating sick animals                                      | <input type="radio"/> | <input type="radio"/> |

\* 26. How do you feel about the following 'One Health' statements?

|                                                                                                                 | Agree                 | Neutral               | Disagree              |
|-----------------------------------------------------------------------------------------------------------------|-----------------------|-----------------------|-----------------------|
| 'One Health' is an important approach that will shape the veterinary / animal health profession                 | <input type="radio"/> | <input type="radio"/> | <input type="radio"/> |
| As a veterinarian, it is my duty to promote the 'One Health' approach                                           | <input type="radio"/> | <input type="radio"/> | <input type="radio"/> |
| There are enough practical frameworks for veterinarians to follow or promote issues about 'One Health'          | <input type="radio"/> | <input type="radio"/> | <input type="radio"/> |
| It is important that my contribution to control / treat zoonoses will bring about a good outcome for the animal | <input type="radio"/> | <input type="radio"/> | <input type="radio"/> |
| It is important that my contribution to control / treat zoonoses will bring about a good outcome for farmer     | <input type="radio"/> | <input type="radio"/> | <input type="radio"/> |
| I have a good understanding of protecting myself and my staff from potential zoonoses risks                     | <input type="radio"/> | <input type="radio"/> | <input type="radio"/> |
| I have a good understanding of anti-microbial stewardship guidelines for veterinarians                          | <input type="radio"/> | <input type="radio"/> | <input type="radio"/> |

\* 27. What is your opinion regarding animal–human health inter-professional collaboration?

|                                                                                                                                                                                                          | Strongly agree        | Neutral               | Disagree              |
|----------------------------------------------------------------------------------------------------------------------------------------------------------------------------------------------------------|-----------------------|-----------------------|-----------------------|
| Veterinarians are better equipped and more knowledgeable than physicians in understanding and approaching zoonotic cases                                                                                 | <input type="radio"/> | <input type="radio"/> | <input type="radio"/> |
| Having a human health referral system to consult veterinarians' animal-related knowledge would bring about positive changes to human health                                                              | <input type="radio"/> | <input type="radio"/> | <input type="radio"/> |
| I would be willing to collaborate with physicians to manage zoonotic cases that affect both my animal patients and human clients                                                                         | <input type="radio"/> | <input type="radio"/> | <input type="radio"/> |
| I expect to be knowledgeable enough, in the future, to provide advice to human clients about preventing zoonotic diseases commonly transmitted from livestock and companion animals                      | <input type="radio"/> | <input type="radio"/> | <input type="radio"/> |
| It will be an important part of my future work to provide advice to clients about preventing zoonotic diseases commonly transmitted from livestock and companion animals                                 | <input type="radio"/> | <input type="radio"/> | <input type="radio"/> |
| A veterinarian should always ask clients if there are any immune-compromised and immune-deficient members, pregnant, young or elderly members living with the livestock as part of the basic information | <input type="radio"/> | <input type="radio"/> | <input type="radio"/> |

\* 28. To what extent is antibiotic resistance a problem in Ethiopia?

- ☐ Not at all a problem
- ☐ Minor problem
- ☐ Moderate problem
- ☐ Serious problem

\* 29. If it is a problem, what do you think is influencing antibiotic resistance in Ethiopia?

- ☐ Antibiotic prescribing behaviour
- ☐ Misuse of antibiotics
- ☐ Non-observing of withdrawal periods
- ☐ Use of antibiotics in feeds
- ☐ Symptomatic treatment of animals (without lab results and guidance)
- ☐ Sub-standard drugs
- ☐ Over-use of drugs
- ☐ Other (please specify)

\* 30. To what extent do you think addressing antibiotic resistance is currently a priority in Ethiopia?

- ☐ Not a priority
- ☐ Low priority
- ☐ Medium priority
- ☐ High priority
- ☐ Essential

\* 31. What are your personal beliefs about antibiotic / antimicrobial use and resistance?

|                                                                                                        | Agree                 | Neutral               | Disagree              |
|--------------------------------------------------------------------------------------------------------|-----------------------|-----------------------|-----------------------|
| Antimicrobials are overused nationally                                                                 | <input type="radio"/> | <input type="radio"/> | <input type="radio"/> |
| Better use of antimicrobials will reduce problems with antimicrobial resistant organisms               | <input type="radio"/> | <input type="radio"/> | <input type="radio"/> |
| Knowledge of appropriate use of antibiotics / antimicrobials is important in my veterinary career      | <input type="radio"/> | <input type="radio"/> | <input type="radio"/> |
| I would like more education on antibacterial / antimicrobial resistance                                | <input type="radio"/> | <input type="radio"/> | <input type="radio"/> |
| New antimicrobials will be developed in the future that will keep up with the problem of resistance    | <input type="radio"/> | <input type="radio"/> | <input type="radio"/> |
| Poor infection control practices by veterinary professionals causes spread of antimicrobial resistance | <input type="radio"/> | <input type="radio"/> | <input type="radio"/> |
| Inappropriate use of antimicrobials causes antimicrobial resistance                                    | <input type="radio"/> | <input type="radio"/> | <input type="radio"/> |
| Antimicrobial resistance will affect animal health and production                                      | <input type="radio"/> | <input type="radio"/> | <input type="radio"/> |
| I have sufficient knowledge on antibiotics use for future clinical practice                            | <input type="radio"/> | <input type="radio"/> | <input type="radio"/> |
| Antibiotics used to treat animals can remain within their tissues                                      | <input type="radio"/> | <input type="radio"/> | <input type="radio"/> |

\* 32. How important do you think would the following sources of information be, in your future work, in determining your antimicrobial choices?

|                                                              | Not at all<br>important | Slightly important    | Moderately<br>important | Very important        | Extremely<br>important |
|--------------------------------------------------------------|-------------------------|-----------------------|-------------------------|-----------------------|------------------------|
| Pharmaceutical company<br>representatives                    | <input type="radio"/>   | <input type="radio"/> | <input type="radio"/>   | <input type="radio"/> | <input type="radio"/>  |
| Label or package inserts                                     | <input type="radio"/>   | <input type="radio"/> | <input type="radio"/>   | <input type="radio"/> | <input type="radio"/>  |
| Peer-reviewed scientific literature                          | <input type="radio"/>   | <input type="radio"/> | <input type="radio"/>   | <input type="radio"/> | <input type="radio"/>  |
| Peers within my practice / office                            | <input type="radio"/>   | <input type="radio"/> | <input type="radio"/>   | <input type="radio"/> | <input type="radio"/>  |
| Peers beyond my practice / office                            | <input type="radio"/>   | <input type="radio"/> | <input type="radio"/>   | <input type="radio"/> | <input type="radio"/>  |
| Clinicians and pharmacists                                   | <input type="radio"/>   | <input type="radio"/> | <input type="radio"/>   | <input type="radio"/> | <input type="radio"/>  |
| Veterinary Information Network<br>(VIN)                      | <input type="radio"/>   | <input type="radio"/> | <input type="radio"/>   | <input type="radio"/> | <input type="radio"/>  |
| Online resource (e.g. blogs, media<br>posts or web searches) | <input type="radio"/>   | <input type="radio"/> | <input type="radio"/>   | <input type="radio"/> | <input type="radio"/>  |
| Textbooks or drug handbooks                                  | <input type="radio"/>   | <input type="radio"/> | <input type="radio"/>   | <input type="radio"/> | <input type="radio"/>  |
| Applications on a smart phone or<br>tablet                   | <input type="radio"/>   | <input type="radio"/> | <input type="radio"/>   | <input type="radio"/> | <input type="radio"/>  |
| Online formulary (list of medicines)                         | <input type="radio"/>   | <input type="radio"/> | <input type="radio"/>   | <input type="radio"/> | <input type="radio"/>  |

\* 33. How confident do you feel that your veterinary medicine studies have prepared you to do the following upon graduation?

|                                                                                                                       | Completely<br>confident | Fairly confident      | Somewhat<br>confident | Slightly<br>confident | Not at all<br>confident |
|-----------------------------------------------------------------------------------------------------------------------|-------------------------|-----------------------|-----------------------|-----------------------|-------------------------|
| To know when to start antimicrobial therapy                                                                           | <input type="radio"/>   | <input type="radio"/> | <input type="radio"/> | <input type="radio"/> | <input type="radio"/>   |
| How to select the best antimicrobial for a specific infection                                                         | <input type="radio"/>   | <input type="radio"/> | <input type="radio"/> | <input type="radio"/> | <input type="radio"/>   |
| How to select the correct dosing                                                                                      | <input type="radio"/>   | <input type="radio"/> | <input type="radio"/> | <input type="radio"/> | <input type="radio"/>   |
| How to select the right duration of treatment for specific infections                                                 | <input type="radio"/>   | <input type="radio"/> | <input type="radio"/> | <input type="radio"/> | <input type="radio"/>   |
| To describe the correct spectrum of antimicrobial therapy for different antimicrobials (what is covered by each drug) | <input type="radio"/>   | <input type="radio"/> | <input type="radio"/> | <input type="radio"/> | <input type="radio"/>   |
| Understand the basic mechanisms of antimicrobial resistance                                                           | <input type="radio"/>   | <input type="radio"/> | <input type="radio"/> | <input type="radio"/> | <input type="radio"/>   |
| How to streamline or deescalate antimicrobial therapy                                                                 | <input type="radio"/>   | <input type="radio"/> | <input type="radio"/> | <input type="radio"/> | <input type="radio"/>   |
| How to interpret antibiograms                                                                                         | <input type="radio"/>   | <input type="radio"/> | <input type="radio"/> | <input type="radio"/> | <input type="radio"/>   |
| How to find reliable sources of information to treat infections                                                       | <input type="radio"/>   | <input type="radio"/> | <input type="radio"/> | <input type="radio"/> | <input type="radio"/>   |
| How to handle a clients who demands antimicrobial therapy that is not indicated                                       | <input type="radio"/>   | <input type="radio"/> | <input type="radio"/> | <input type="radio"/> | <input type="radio"/>   |

## Sources of information

\* 34. What are your main sources of information about...

|                              | Education<br>curriculum  | Colleagues<br>and friends | Mass media<br>(TV, Radion<br>newspaper) | Scientific<br>journals   | Online<br>searches<br>(i.e Google) | Social<br>networks<br>(i.e.<br>Facebook,<br>Twitter,<br>Instagram,<br>LinkedIn) | Government<br>communication | Professional<br>association<br>and<br>subscriptions |
|------------------------------|--------------------------|---------------------------|-----------------------------------------|--------------------------|------------------------------------|---------------------------------------------------------------------------------|-----------------------------|-----------------------------------------------------|
| Zoonoses                     | <input type="checkbox"/> | <input type="checkbox"/>  | <input type="checkbox"/>                | <input type="checkbox"/> | <input type="checkbox"/>           | <input type="checkbox"/>                                                        | <input type="checkbox"/>    | <input type="checkbox"/>                            |
| Biosecurity measures         | <input type="checkbox"/> | <input type="checkbox"/>  | <input type="checkbox"/>                | <input type="checkbox"/> | <input type="checkbox"/>           | <input type="checkbox"/>                                                        | <input type="checkbox"/>    | <input type="checkbox"/>                            |
| One-Health                   | <input type="checkbox"/> | <input type="checkbox"/>  | <input type="checkbox"/>                | <input type="checkbox"/> | <input type="checkbox"/>           | <input type="checkbox"/>                                                        | <input type="checkbox"/>    | <input type="checkbox"/>                            |
| Antibiotic resistance        | <input type="checkbox"/> | <input type="checkbox"/>  | <input type="checkbox"/>                | <input type="checkbox"/> | <input type="checkbox"/>           | <input type="checkbox"/>                                                        | <input type="checkbox"/>    | <input type="checkbox"/>                            |
| New treatments               | <input type="checkbox"/> | <input type="checkbox"/>  | <input type="checkbox"/>                | <input type="checkbox"/> | <input type="checkbox"/>           | <input type="checkbox"/>                                                        | <input type="checkbox"/>    | <input type="checkbox"/>                            |
| Animal diseases<br>outbreaks | <input type="checkbox"/> | <input type="checkbox"/>  | <input type="checkbox"/>                | <input type="checkbox"/> | <input type="checkbox"/>           | <input type="checkbox"/>                                                        | <input type="checkbox"/>    | <input type="checkbox"/>                            |

\* 35. How easy is it to get information on the following topics?

|                               | Very easy             | Easy                  | Moderately easy       | Difficult             |
|-------------------------------|-----------------------|-----------------------|-----------------------|-----------------------|
| Zoonoses                      | <input type="radio"/> | <input type="radio"/> | <input type="radio"/> | <input type="radio"/> |
| Personal biosecurity measures | <input type="radio"/> | <input type="radio"/> | <input type="radio"/> | <input type="radio"/> |
| Farm biosecurity measures     | <input type="radio"/> | <input type="radio"/> | <input type="radio"/> | <input type="radio"/> |
| One-Health                    | <input type="radio"/> | <input type="radio"/> | <input type="radio"/> | <input type="radio"/> |
| Antibiotic resistance         | <input type="radio"/> | <input type="radio"/> | <input type="radio"/> | <input type="radio"/> |
| New treatments                | <input type="radio"/> | <input type="radio"/> | <input type="radio"/> | <input type="radio"/> |
| Animal disease outbreaks      | <input type="radio"/> | <input type="radio"/> | <input type="radio"/> | <input type="radio"/> |



\* 36. How easy is it to get information from the above sources?

|                                                         | Very easy             | Easy                  | Moderately Easy       | Difficult             |
|---------------------------------------------------------|-----------------------|-----------------------|-----------------------|-----------------------|
| Training curriculum                                     | <input type="radio"/> | <input type="radio"/> | <input type="radio"/> | <input type="radio"/> |
| Colleagues and friends                                  | <input type="radio"/> | <input type="radio"/> | <input type="radio"/> | <input type="radio"/> |
| Mass media (TV, Radion newspaper)                       | <input type="radio"/> | <input type="radio"/> | <input type="radio"/> | <input type="radio"/> |
| Scientific journals                                     | <input type="radio"/> | <input type="radio"/> | <input type="radio"/> | <input type="radio"/> |
| Online searches i.e google                              | <input type="radio"/> | <input type="radio"/> | <input type="radio"/> | <input type="radio"/> |
| Social networks (Facebook, twitter, instagram, LinkdIn) | <input type="radio"/> | <input type="radio"/> | <input type="radio"/> | <input type="radio"/> |
| Government communication                                | <input type="radio"/> | <input type="radio"/> | <input type="radio"/> | <input type="radio"/> |
| Professional association and subscriptions              | <input type="radio"/> | <input type="radio"/> | <input type="radio"/> | <input type="radio"/> |

\* 37. In your opinion, what are the **5 most important personal attributes (characteristics)** in a veterinary surgeon?

|                                                          | First attribute       | Second attribute      | Third attribute       | Fourth attribute      | Fifth attribute       |
|----------------------------------------------------------|-----------------------|-----------------------|-----------------------|-----------------------|-----------------------|
| Confidence                                               | <input type="radio"/> | <input type="radio"/> | <input type="radio"/> | <input type="radio"/> | <input type="radio"/> |
| Friendliness                                             | <input type="radio"/> | <input type="radio"/> | <input type="radio"/> | <input type="radio"/> | <input type="radio"/> |
| Knowledge about veterinary medicine and surgery          | <input type="radio"/> | <input type="radio"/> | <input type="radio"/> | <input type="radio"/> | <input type="radio"/> |
| Cleanliness                                              | <input type="radio"/> | <input type="radio"/> | <input type="radio"/> | <input type="radio"/> | <input type="radio"/> |
| Good at explaining technical terms                       | <input type="radio"/> | <input type="radio"/> | <input type="radio"/> | <input type="radio"/> | <input type="radio"/> |
| Professional appearance                                  | <input type="radio"/> | <input type="radio"/> | <input type="radio"/> | <input type="radio"/> | <input type="radio"/> |
| Compassion for patients                                  | <input type="radio"/> | <input type="radio"/> | <input type="radio"/> | <input type="radio"/> | <input type="radio"/> |
| Compassion for owners                                    | <input type="radio"/> | <input type="radio"/> | <input type="radio"/> | <input type="radio"/> | <input type="radio"/> |
| Good communication skills                                | <input type="radio"/> | <input type="radio"/> | <input type="radio"/> | <input type="radio"/> | <input type="radio"/> |
| A likeable personality                                   | <input type="radio"/> | <input type="radio"/> | <input type="radio"/> | <input type="radio"/> | <input type="radio"/> |
| Patience                                                 | <input type="radio"/> | <input type="radio"/> | <input type="radio"/> | <input type="radio"/> | <input type="radio"/> |
| Good listening skills                                    | <input type="radio"/> | <input type="radio"/> | <input type="radio"/> | <input type="radio"/> | <input type="radio"/> |
| Recognises own limitations and knows when to seek advice | <input type="radio"/> | <input type="radio"/> | <input type="radio"/> | <input type="radio"/> | <input type="radio"/> |
| Clear about cost of treatment                            | <input type="radio"/> | <input type="radio"/> | <input type="radio"/> | <input type="radio"/> | <input type="radio"/> |
| Ability to work in a team                                | <input type="radio"/> | <input type="radio"/> | <input type="radio"/> | <input type="radio"/> | <input type="radio"/> |
| Honesty                                                  | <input type="radio"/> | <input type="radio"/> | <input type="radio"/> | <input type="radio"/> | <input type="radio"/> |
| Politeness                                               | <input type="radio"/> | <input type="radio"/> | <input type="radio"/> | <input type="radio"/> | <input type="radio"/> |
| Decisiveness                                             | <input type="radio"/> | <input type="radio"/> | <input type="radio"/> | <input type="radio"/> | <input type="radio"/> |
| Good with animals                                        | <input type="radio"/> | <input type="radio"/> | <input type="radio"/> | <input type="radio"/> | <input type="radio"/> |
| Good practical skills                                    | <input type="radio"/> | <input type="radio"/> | <input type="radio"/> | <input type="radio"/> | <input type="radio"/> |

\* 38. In your opinion, what are the **5 least important personal attributes (characteristics)** in a veterinary surgeon?

|                                                          | First attribute       | Second attribute      | Third attribute       | Fourth attribute      | Fifth attribute       |
|----------------------------------------------------------|-----------------------|-----------------------|-----------------------|-----------------------|-----------------------|
| Confidence                                               | <input type="radio"/> | <input type="radio"/> | <input type="radio"/> | <input type="radio"/> | <input type="radio"/> |
| Friendliness                                             | <input type="radio"/> | <input type="radio"/> | <input type="radio"/> | <input type="radio"/> | <input type="radio"/> |
| Knowledge about veterinary medicine and surgery          | <input type="radio"/> | <input type="radio"/> | <input type="radio"/> | <input type="radio"/> | <input type="radio"/> |
| Cleanliness                                              | <input type="radio"/> | <input type="radio"/> | <input type="radio"/> | <input type="radio"/> | <input type="radio"/> |
| Good at explaining technical terms                       | <input type="radio"/> | <input type="radio"/> | <input type="radio"/> | <input type="radio"/> | <input type="radio"/> |
| Professional appearance                                  | <input type="radio"/> | <input type="radio"/> | <input type="radio"/> | <input type="radio"/> | <input type="radio"/> |
| Compassion for patients                                  | <input type="radio"/> | <input type="radio"/> | <input type="radio"/> | <input type="radio"/> | <input type="radio"/> |
| Compassion for owners                                    | <input type="radio"/> | <input type="radio"/> | <input type="radio"/> | <input type="radio"/> | <input type="radio"/> |
| Good communication skills                                | <input type="radio"/> | <input type="radio"/> | <input type="radio"/> | <input type="radio"/> | <input type="radio"/> |
| A likeable personality                                   | <input type="radio"/> | <input type="radio"/> | <input type="radio"/> | <input type="radio"/> | <input type="radio"/> |
| Patience                                                 | <input type="radio"/> | <input type="radio"/> | <input type="radio"/> | <input type="radio"/> | <input type="radio"/> |
| Good listening skills                                    | <input type="radio"/> | <input type="radio"/> | <input type="radio"/> | <input type="radio"/> | <input type="radio"/> |
| Recognises own limitations and knows when to seek advice | <input type="radio"/> | <input type="radio"/> | <input type="radio"/> | <input type="radio"/> | <input type="radio"/> |
| Clear about cost of treatment                            | <input type="radio"/> | <input type="radio"/> | <input type="radio"/> | <input type="radio"/> | <input type="radio"/> |
| Ability to work in a team                                | <input type="radio"/> | <input type="radio"/> | <input type="radio"/> | <input type="radio"/> | <input type="radio"/> |
| Honesty                                                  | <input type="radio"/> | <input type="radio"/> | <input type="radio"/> | <input type="radio"/> | <input type="radio"/> |
| Politeness                                               | <input type="radio"/> | <input type="radio"/> | <input type="radio"/> | <input type="radio"/> | <input type="radio"/> |
| Decisiveness                                             | <input type="radio"/> | <input type="radio"/> | <input type="radio"/> | <input type="radio"/> | <input type="radio"/> |
| Good with animals                                        | <input type="radio"/> | <input type="radio"/> | <input type="radio"/> | <input type="radio"/> | <input type="radio"/> |
| Good practical skills                                    | <input type="radio"/> | <input type="radio"/> | <input type="radio"/> | <input type="radio"/> | <input type="radio"/> |
